# Supplementary material for: Transportation Efficiency of Railway Operation Enterprises
Source: Research Square preprint supplement (doi:10.21203/rs.3.rs-2316597/v1), 2022-11-30
Supplement: Supplementary file 1 [file 0757b1c073ae1d2a9721d96c.docx]

| variable | Interpretation of meaning |
| --- | --- |
|  | Relaxation variable |
|  | Relaxation variable |
|  | Comprehensive efficiency |
| *m* | Input indicators |
| *s* | Output indicators |
|  | The weight of DMU |
|  | Inputs of DMUs |
|  | Outputs of DMUs |
|  | external environment variables |
|  | The coefficient to be estimated of external environmental variables |
|  | Feasible relaxation frontier |
|  | Random error term |
|  | Management inefficiency |
|  | All DMUs are placed in the same environment |
|  | Estimated values |
|  | Standard normal distribution of probability density function |
|  | Cumulative distribution function respectively |

**Table A2** Formula variable index table
