# Supplementary material for: Transportation Efficiency of Railway Operation Enterprises
Source: Research Square preprint supplement (doi:10.21203/rs.3.rs-2316597/v1), 2022-11-30
Supplement: Supplementary file 2 [file 477e3f1d37c068ebb8794306.docx]

**Table A4** Three-stage comprehensive transportation efficiency

| enterprise | 2000 | 2001 | 2002 | 2003 | 2004 | 2005 | 2006 | 2007 | 2008 | 2009 | 2010 | 2011 | 2012 | 2013 | 2014 | 2015 | 2016 | 2017 | 2018 | 2019 | 2020 | mean |
| --- | --- | --- | --- | --- | --- | --- | --- | --- | --- | --- | --- | --- | --- | --- | --- | --- | --- | --- | --- | --- | --- | --- |
| ÖBB | 0.039 | 0.040 | 0.041 | 0.041 | 0.043 | 0.041 | 0.044 | 0.044 | 0.050 | 0.049 | 0.054 | 0.050 | 0.052 | 0.053 | 0.053 | 0.053 | 0.069 | 0.078 | 0.075 | 0.058 | 0.058 | 0.052 |
| GKB | 0.001 | 0.001 | 0.001 | 0.001 | 0.001 | 0.001 | 0.001 | 0.001 | 0.001 | 0.001 | 0.001 | 0.001 | 0.001 | 0.001 | 0.001 | 0.001 | 0.001 | 0.001 | 0.001 | 0.001 | 0.001 | 0.001 |
| SNCB | 0.043 | 0.044 | 0.045 | 0.045 | 0.048 | 0.050 | 0.053 | 0.055 | 0.057 | 0.057 | 0.057 | 0.059 | 0.059 | 0.059 | 0.058 | 0.057 | 0.057 | 0.057 | 0.059 | 0.061 | 0.062 | 0.054 |
| BDZ | 0.018 | 0.015 | 0.013 | 0.014 | 0.014 | 0.013 | 0.014 | 0.013 | 0.013 | 0.012 | 0.012 | 0.012 | 0.011 | 0.010 | 0.010 | 0.009 | 0.008 | 0.008 | 0.008 | 0.009 | 0.007 | 0.012 |
| CD | 0.036 | 0.035 | 0.035 | 0.035 | 0.034 | 0.032 | 0.035 | 0.037 | 0.036 | 0.033 | 0.034 | 0.035 | 0.037 | 0.037 | 0.037 | 0.039 | 0.040 | 0.042 | 0.044 | 0.046 | 0.027 | 0.036 |
| EVR | 0.025 | 0.027 | 0.030 | 0.030 | 0.033 | 0.033 | 0.033 | 0.026 | 0.019 | 0.019 | 0.021 | 0.020 | 0.016 | 0.015 | 0.010 | 0.010 | 0.007 | 0.007 | 0.008 | 0.007 | 0.007 | 0.019 |
| VR | 0.024 | 0.023 | 0.023 | 0.024 | 0.024 | 0.023 | 0.026 | 0.025 | 0.026 | 0.023 | 0.025 | 0.024 | 0.024 | 0.025 | 0.024 | 0.024 | 0.025 | 0.027 | 0.029 | 0.029 | 0.031 | 0.025 |
| SNCF | 0.229 | 0.233 | 0.239 | 0.235 | 0.242 | 0.252 | 0.260 | 0.270 | 0.285 | 0.285 | 0.286 | 0.290 | 0.290 | 0.289 | 0.284 | 0.339 | 0.344 | 0.320 | 0.316 | 0.336 | 0.358 | 0.285 |
| DB AG | 0.219 | 0.238 | 0.233 | 0.192 | 0.201 | 0.210 | 0.214 | 0.212 | 0.212 | 0.212 | 0.213 | 0.201 | 0.203 | 0.199 | 0.195 | 0.197 | 0.198 | 0.200 | 0.201 | 0.202 | 0.207 | 0.208 |
| GYSEV/RÖEE | 0.002 | 0.002 | 0.001 | 0.002 | 0.002 | 0.002 | 0.002 | 0.002 | 0.002 | 0.001 | 0.001 | 0.002 | 0.004 | 0.004 | 0.002 | 0.002 | 0.002 | 0.004 | 0.004 | 0.004 | 0.004 | 0.002 |
| MAV | 0.033 | 0.035 | 0.036 | 0.036 | 0.035 | 0.035 | 0.034 | 0.030 | 0.031 | 0.030 | 0.027 | 0.028 | 0.029 | 0.028 | 0.028 | 0.027 | 0.028 | 0.028 | 0.028 | 0.028 | 0.028 | 0.031 |
| CIE | 0.010 | 0.010 | 0.010 | 0.010 | 0.010 | 0.011 | 0.012 | 0.013 | 0.013 | 0.011 | 0.011 | 0.010 | 0.010 | 0.010 | 0.011 | 0.013 | 0.013 | 0.014 | 0.014 | 0.014 | 0.014 | 0.012 |
| FS SpA | 0.173 | 0.188 | 0.185 | 0.181 | 0.182 | 0.185 | 0.186 | 0.184 | 0.185 | 0.182 | 0.181 | 0.166 | 0.162 | 0.163 | 0.168 | 0.172 | 0.198 | 0.195 | 0.191 | 0.191 | 0.191 | 0.181 |
| LDZ | 0.038 | 0.041 | 0.043 | 0.052 | 0.054 | 0.058 | 0.049 | 0.054 | 0.057 | 0.056 | 0.051 | 0.064 | 0.065 | 0.058 | 0.058 | 0.056 | 0.047 | 0.045 | 0.054 | 0.045 | 0.045 | 0.052 |
| LTG | 0.026 | 0.023 | 0.029 | 0.034 | 0.034 | 0.037 | 0.038 | 0.043 | 0.044 | 0.035 | 0.040 | 0.045 | 0.042 | 0.040 | 0.042 | 0.041 | 0.041 | 0.045 | 0.050 | 0.048 | 0.047 | 0.039 |
| CFL | 0.002 | 0.002 | 0.002 | 0.002 | 0.002 | 0.002 | 0.002 | 0.002 | 0.002 | 0.002 | 0.002 | 0.003 | 0.003 | 0.003 | 0.003 | 0.003 | 0.003 | 0.003 | 0.003 | 0.003 | 0.003 | 0.002 |
| PKP | 0.076 | 0.073 | 0.073 | 0.080 | 0.079 | 0.074 | 0.073 | 0.074 | 0.072 | 0.066 | 0.066 | 0.070 | 0.064 | 0.062 | 0.059 | 0.046 | 0.048 | 0.052 | 0.054 | 0.054 | 0.057 | 0.065 |
| FGC | 0.005 | 0.005 | 0.006 | 0.006 | 0.006 | 0.006 | 0.006 | 0.006 | 0.006 | 0.006 | 0.006 | 0.006 | 0.006 | 0.006 | 0.006 | 0.007 | 0.007 | 0.007 | 0.008 | 0.008 | 0.008 | 0.006 |
| SZ | 0.008 | 0.008 | 0.009 | 0.010 | 0.010 | 0.010 | 0.010 | 0.011 | 0.011 | 0.008 | 0.010 | 0.011 | 0.010 | 0.011 | 0.012 | 0.012 | 0.012 | 0.013 | 0.014 | 0.014 | 0.017 | 0.011 |
| BLS | 0.004 | 0.004 | 0.004 | 0.005 | 0.007 | 0.010 | 0.011 | 0.011 | 0.012 | 0.006 | 0.006 | 0.006 | 0.007 | 0.007 | 0.007 | 0.007 | 0.007 | 0.008 | 0.008 | 0.008 | 0.008 | 0.007 |
| SBB CFF FFS | 0.074 | 0.076 | 0.081 | 0.070 | 0.070 | 0.079 | 0.082 | 0.086 | 0.092 | 0.094 | 0.095 | 0.094 | 0.094 | 0.096 | 0.098 | 0.100 | 0.105 | 0.105 | 0.102 | 0.109 | 0.110 | 0.091 |
| ZBH | 0.000 | 0.001 | 0.001 | 0.001 | 0.001 | 0.003 | 0.002 | 0.002 | 0.003 | 0.002 | 0.003 | 0.003 | 0.002 | 0.003 | 0.003 | 0.003 | 0.003 | 0.002 | 0.003 | 0.003 | 0.003 | 0.002 |
| ZRS | 0.000 | 0.000 | 0.000 | 0.000 | 0.001 | 0.003 | 0.001 | 0.001 | 0.001 | 0.001 | 0.001 | 0.001 | 0.002 | 0.002 | 0.001 | 0.002 | 0.001 | 0.001 | 0.001 | 0.001 | 0.001 | 0.001 |
| ZS | 0.008 | 0.007 | 0.007 | 0.006 | 0.008 | 0.009 | 0.011 | 0.011 | 0.011 | 0.007 | 0.008 | 0.009 | 0.007 | 0.007 | 0.007 | 0.004 | 0.008 | 0.009 | 0.010 | 0.012 | 0.015 | 0.009 |
| BC | 0.091 | 0.081 | 0.083 | 0.090 | 0.094 | 0.101 | 0.107 | 0.112 | 0.112 | 0.096 | 0.104 | 0.111 | 0.109 | 0.099 | 0.102 | 0.093 | 0.094 | 0.112 | 0.121 | 0.111 | 0.098 | 0.101 |
| RZD | 0.644 | 0.590 | 0.628 | 0.689 | 0.689 | 0.639 | 0.686 | 0.850 | 0.869 | 0.667 | 0.742 | 0.784 | 0.846 | 0.846 | 0.870 | 0.881 | 0.899 | 0.957 | 1.000 | 1.000 | 1.000 | 0.799 |
| TCDD | 0.051 | 0.040 | 0.038 | 0.046 | 0.050 | 0.050 | 0.029 | 0.030 | 0.028 | 0.029 | 0.030 | 0.039 | 0.034 | 0.034 | 0.040 | 0.045 | 0.043 | 0.047 | 0.049 | 0.048 | 0.061 | 0.041 |
| SCR | 0.001 | 0.001 | 0.001 | 0.002 | 0.002 | 0.002 | 0.002 | 0.002 | 0.002 | 0.002 | 0.002 | 0.003 | 0.003 | 0.003 | 0.002 | 0.002 | 0.002 | 0.002 | 0.002 | 0.002 | 0.002 | 0.002 |
| AZ | 0.016 | 0.018 | 0.020 | 0.022 | 0.022 | 0.022 | 0.022 | 0.025 | 0.029 | 0.022 | 0.024 | 0.023 | 0.024 | 0.024 | 0.024 | 0.018 | 0.018 | 0.015 | 0.013 | 0.015 | 0.015 | 0.021 |
| CR | 0.819 | 0.799 | 0.831 | 0.876 | 0.960 | 1.000 | 0.895 | 0.951 | 1.000 | 0.888 | 0.973 | 1.000 | 0.990 | 1.000 | 0.991 | 0.959 | 0.963 | 1.000 | 1.000 | 1.000 | 0.806 | 0.938 |
| GR | 0.012 | 0.013 | 0.015 | 0.016 | 0.015 | 0.019 | 0.022 | 0.021 | 0.020 | 0.016 | 0.019 | 0.019 | 0.018 | 0.017 | 0.015 | 0.013 | 0.011 | 0.009 | 0.008 | 0.009 | 0.009 | 0.015 |
| IR | 0.522 | 0.535 | 0.555 | 0.580 | 0.607 | 0.641 | 0.686 | 0.753 | 0.831 | 0.886 | 0.957 | 0.951 | 0.951 | 0.951 | 1.000 | 0.986 | 0.986 | 0.958 | 0.981 | 0.945 | 0.849 | 0.815 |
| JR | 0.778 | 0.805 | 0.815 | 0.835 | 0.840 | 0.857 | 0.883 | 0.897 | 0.901 | 0.886 | 0.918 | 0.832 | 0.829 | 0.855 | 0.932 | 0.948 | 0.738 | 0.956 | 0.949 | 0.961 | 1.000 | 0.877 |
| KTZ | 0.209 | 0.226 | 0.228 | 0.253 | 0.280 | 0.289 | 0.322 | 0.321 | 0.368 | 0.337 | 0.360 | 0.380 | 0.398 | 0.398 | 0.404 | 0.383 | 1.000 | 1.000 | 0.353 | 0.353 | 0.377 | 0.392 |
| KORAIL | 0.172 | 0.172 | 0.169 | 0.168 | 0.167 | 0.179 | 0.179 | 0.179 | 0.182 | 0.178 | 0.184 | 0.120 | 0.123 | 0.126 | 0.127 | 0.127 | 0.130 | 0.131 | 0.121 | 0.127 | 0.129 | 0.152 |
| UTI | 0.039 | 0.040 | 0.046 | 0.047 | 0.047 | 0.049 | 0.048 | 0.052 | 0.057 | 0.064 | 0.059 | 0.059 | 0.059 | 0.059 | 0.060 | 0.060 | 0.060 | 0.059 | 0.057 | 0.056 | 0.056 | 0.054 |
| CFR-SA | 0.048 | 0.046 | 0.037 | 0.042 | 0.040 | 0.043 | 0.038 | 0.035 | 0.032 | 0.028 | 0.028 | 0.024 | 0.021 | 0.020 | 0.023 | 0.023 | 0.023 | 0.026 | 0.025 | 0.027 | 0.017 | 0.031 |
| QR | 0.077 | 0.088 | 0.090 | 0.095 | 0.097 | 0.106 | 0.106 | 0.106 | 0.137 | 0.139 | 0.143 | 0.139 | 0.139 | 0.139 | 0.139 | 0.139 | 0.139 | 0.139 | 0.139 | 0.139 | 0.132 | 0.122 |
| mean | 0.120 | 0.121 | 0.124 | 0.128 | 0.133 | 0.136 | 0.137 | 0.146 | 0.153 | 0.143 | 0.151 | 0.150 | 0.151 | 0.152 | 0.155 | 0.155 | 0.168 | 0.176 | 0.161 | 0.160 | 0.154 | 0.146 |
