# Supplementary material for: Transportation Efficiency of Railway Operation Enterprises
Source: Research Square preprint supplement (doi:10.21203/rs.3.rs-2316597/v1), 2022-11-30
Supplement: Supplementary file 3 [file 936dab6aa44a5f0648c228b3.docx]

**Table A5** Comprehensive Transportation Efficiency after Bootstrap Deviation Correction

| enterprise | 2000 | 2001 | 2002 | 2003 | 2004 | 2005 | 2006 | 2007 | 2008 | 2009 | 2010 | 2011 | 2012 | 2013 | 2014 | 2015 | 2016 | 2017 | 2018 | 2019 | 2020 | mean |
| --- | --- | --- | --- | --- | --- | --- | --- | --- | --- | --- | --- | --- | --- | --- | --- | --- | --- | --- | --- | --- | --- | --- |
| ÖBB | 0.035 | 0.035 | 0.036 | 0.036 | 0.039 | 0.037 | 0.039 | 0.039 | 0.046 | 0.043 | 0.048 | 0.046 | 0.045 | 0.048 | 0.049 | 0.047 | 0.063 | 0.073 | 0.070 | 0.050 | 0.053 | 0.046 |
| GKB | 0.001 | 0.001 | 0.001 | 0.001 | 0.001 | 0.001 | 0.001 | 0.001 | 0.001 | 0.001 | 0.001 | 0.001 | 0.001 | 0.001 | 0.001 | 0.001 | 0.001 | 0.001 | 0.001 | 0.001 | 0.001 | 0.001 |
| SNCB | 0.040 | 0.042 | 0.043 | 0.043 | 0.045 | 0.047 | 0.049 | 0.052 | 0.054 | 0.054 | 0.054 | 0.056 | 0.056 | 0.056 | 0.054 | 0.053 | 0.053 | 0.053 | 0.054 | 0.056 | 0.057 | 0.051 |
| BDZ | 0.016 | 0.014 | 0.012 | 0.012 | 0.013 | 0.012 | 0.012 | 0.012 | 0.012 | 0.011 | 0.011 | 0.011 | 0.010 | 0.010 | 0.009 | 0.008 | 0.008 | 0.008 | 0.008 | 0.008 | 0.006 | 0.011 |
| CD | 0.032 | 0.031 | 0.031 | 0.031 | 0.030 | 0.027 | 0.031 | 0.033 | 0.032 | 0.031 | 0.031 | 0.032 | 0.035 | 0.035 | 0.036 | 0.037 | 0.038 | 0.040 | 0.042 | 0.044 | 0.026 | 0.034 |
| EVR | 0.024 | 0.025 | 0.029 | 0.029 | 0.031 | 0.032 | 0.031 | 0.025 | 0.018 | 0.018 | 0.020 | 0.019 | 0.016 | 0.014 | 0.010 | 0.010 | 0.007 | 0.007 | 0.008 | 0.006 | 0.006 | 0.018 |
| VR | 0.022 | 0.021 | 0.021 | 0.021 | 0.022 | 0.021 | 0.024 | 0.022 | 0.023 | 0.021 | 0.022 | 0.022 | 0.022 | 0.022 | 0.022 | 0.022 | 0.022 | 0.024 | 0.026 | 0.026 | 0.029 | 0.023 |
| SNCF | 0.223 | 0.226 | 0.232 | 0.228 | 0.235 | 0.244 | 0.252 | 0.261 | 0.277 | 0.277 | 0.277 | 0.281 | 0.279 | 0.278 | 0.273 | 0.327 | 0.330 | 0.300 | 0.295 | 0.313 | 0.334 | 0.273 |
| DB AG | 0.214 | 0.233 | 0.229 | 0.187 | 0.195 | 0.203 | 0.207 | 0.203 | 0.205 | 0.206 | 0.205 | 0.193 | 0.193 | 0.188 | 0.185 | 0.188 | 0.187 | 0.188 | 0.188 | 0.188 | 0.190 | 0.199 |
| GYSEV/RÖEE | 0.002 | 0.002 | 0.001 | 0.001 | 0.001 | 0.002 | 0.002 | 0.002 | 0.002 | 0.001 | 0.001 | 0.002 | 0.004 | 0.003 | 0.002 | 0.002 | 0.002 | 0.003 | 0.004 | 0.004 | 0.004 | 0.002 |
| MAV | 0.031 | 0.032 | 0.033 | 0.033 | 0.032 | 0.032 | 0.032 | 0.028 | 0.028 | 0.029 | 0.025 | 0.027 | 0.027 | 0.027 | 0.027 | 0.026 | 0.026 | 0.026 | 0.027 | 0.026 | 0.026 | 0.029 |
| CIE | 0.009 | 0.009 | 0.010 | 0.009 | 0.009 | 0.011 | 0.011 | 0.012 | 0.012 | 0.010 | 0.010 | 0.010 | 0.009 | 0.009 | 0.010 | 0.012 | 0.012 | 0.013 | 0.013 | 0.013 | 0.013 | 0.011 |
| FS SpA | 0.168 | 0.182 | 0.179 | 0.175 | 0.177 | 0.179 | 0.180 | 0.178 | 0.179 | 0.177 | 0.176 | 0.162 | 0.157 | 0.159 | 0.163 | 0.167 | 0.174 | 0.190 | 0.185 | 0.184 | 0.184 | 0.175 |
| LDZ | 0.036 | 0.039 | 0.041 | 0.050 | 0.052 | 0.055 | 0.047 | 0.051 | 0.055 | 0.053 | 0.049 | 0.061 | 0.062 | 0.056 | 0.055 | 0.054 | 0.045 | 0.043 | 0.051 | 0.043 | 0.043 | 0.049 |
| LTG | 0.025 | 0.022 | 0.028 | 0.032 | 0.033 | 0.035 | 0.037 | 0.041 | 0.042 | 0.034 | 0.038 | 0.043 | 0.040 | 0.038 | 0.040 | 0.039 | 0.039 | 0.043 | 0.048 | 0.046 | 0.045 | 0.037 |
| CFL | 0.002 | 0.002 | 0.002 | 0.002 | 0.002 | 0.002 | 0.002 | 0.002 | 0.002 | 0.002 | 0.002 | 0.002 | 0.003 | 0.003 | 0.003 | 0.003 | 0.003 | 0.003 | 0.003 | 0.003 | 0.003 | 0.002 |
| PKP | 0.070 | 0.068 | 0.068 | 0.075 | 0.074 | 0.069 | 0.068 | 0.069 | 0.067 | 0.063 | 0.062 | 0.066 | 0.060 | 0.058 | 0.055 | 0.041 | 0.044 | 0.049 | 0.050 | 0.051 | 0.055 | 0.061 |
| FGC | 0.005 | 0.005 | 0.006 | 0.006 | 0.006 | 0.006 | 0.006 | 0.006 | 0.006 | 0.006 | 0.006 | 0.006 | 0.006 | 0.006 | 0.006 | 0.006 | 0.007 | 0.007 | 0.007 | 0.008 | 0.008 | 0.006 |
| SZ | 0.007 | 0.007 | 0.008 | 0.009 | 0.010 | 0.009 | 0.010 | 0.010 | 0.010 | 0.007 | 0.009 | 0.010 | 0.009 | 0.010 | 0.011 | 0.011 | 0.011 | 0.013 | 0.013 | 0.013 | 0.016 | 0.010 |
| BLS | 0.003 | 0.004 | 0.004 | 0.004 | 0.006 | 0.010 | 0.010 | 0.010 | 0.011 | 0.005 | 0.005 | 0.006 | 0.006 | 0.006 | 0.007 | 0.007 | 0.007 | 0.007 | 0.007 | 0.008 | 0.008 | 0.007 |
| SBB CFF FFS | 0.070 | 0.073 | 0.078 | 0.067 | 0.066 | 0.075 | 0.078 | 0.081 | 0.088 | 0.089 | 0.091 | 0.090 | 0.090 | 0.092 | 0.094 | 0.096 | 0.100 | 0.100 | 0.097 | 0.104 | 0.105 | 0.087 |
| ZBH | 0.000 | 0.001 | 0.001 | 0.001 | 0.001 | 0.002 | 0.002 | 0.002 | 0.003 | 0.002 | 0.003 | 0.003 | 0.002 | 0.002 | 0.003 | 0.003 | 0.002 | 0.002 | 0.003 | 0.003 | 0.003 | 0.002 |
| ZRS | 0.000 | 0.000 | 0.000 | 0.000 | 0.001 | 0.002 | 0.001 | 0.001 | 0.001 | 0.001 | 0.001 | 0.001 | 0.001 | 0.001 | 0.001 | 0.001 | 0.001 | 0.001 | 0.001 | 0.001 | 0.001 | 0.001 |
| ZS | 0.007 | 0.006 | 0.006 | 0.006 | 0.008 | 0.008 | 0.010 | 0.010 | 0.010 | 0.007 | 0.008 | 0.009 | 0.007 | 0.006 | 0.006 | 0.004 | 0.008 | 0.008 | 0.010 | 0.012 | 0.014 | 0.008 |
| BC | 0.076 | 0.068 | 0.070 | 0.077 | 0.081 | 0.089 | 0.097 | 0.102 | 0.102 | 0.086 | 0.093 | 0.100 | 0.098 | 0.089 | 0.093 | 0.085 | 0.087 | 0.104 | 0.113 | 0.103 | 0.091 | 0.091 |
| RZD | 0.540 | 0.493 | 0.521 | 0.570 | 0.570 | 0.570 | 0.580 | 0.692 | 0.781 | 0.594 | 0.636 | 0.672 | 0.717 | 0.717 | 0.708 | 0.701 | 0.701 | 0.738 | 0.765 | 0.726 | 0.729 | 0.653 |
| TCDD | 0.048 | 0.037 | 0.036 | 0.043 | 0.047 | 0.047 | 0.026 | 0.027 | 0.024 | 0.027 | 0.027 | 0.036 | 0.032 | 0.032 | 0.038 | 0.043 | 0.041 | 0.044 | 0.047 | 0.045 | 0.058 | 0.038 |
| SCR | 0.001 | 0.001 | 0.001 | 0.002 | 0.002 | 0.002 | 0.002 | 0.002 | 0.002 | 0.002 | 0.002 | 0.002 | 0.003 | 0.003 | 0.002 | 0.002 | 0.002 | 0.002 | 0.002 | 0.002 | 0.002 | 0.002 |
| AZ | 0.016 | 0.017 | 0.019 | 0.021 | 0.021 | 0.021 | 0.021 | 0.024 | 0.027 | 0.021 | 0.023 | 0.022 | 0.023 | 0.023 | 0.023 | 0.017 | 0.017 | 0.015 | 0.013 | 0.014 | 0.014 | 0.020 |
| CR | 0.656 | 0.642 | 0.669 | 0.701 | 0.763 | 0.794 | 0.696 | 0.737 | 0.768 | 0.716 | 0.783 | 0.799 | 0.809 | 0.814 | 0.822 | 0.805 | 0.803 | 0.801 | 0.811 | 0.828 | 0.733 | 0.760 |
| GR | 0.011 | 0.013 | 0.015 | 0.016 | 0.014 | 0.018 | 0.021 | 0.020 | 0.019 | 0.016 | 0.018 | 0.018 | 0.017 | 0.016 | 0.015 | 0.013 | 0.010 | 0.009 | 0.007 | 0.009 | 0.008 | 0.014 |
| IR | 0.429 | 0.439 | 0.458 | 0.482 | 0.513 | 0.539 | 0.580 | 0.629 | 0.693 | 0.742 | 0.803 | 0.770 | 0.771 | 0.773 | 0.780 | 0.776 | 0.781 | 0.762 | 0.812 | 0.785 | 0.709 | 0.668 |
| JR | 0.701 | 0.733 | 0.743 | 0.754 | 0.764 | 0.779 | 0.805 | 0.817 | 0.814 | 0.797 | 0.850 | 0.737 | 0.737 | 0.767 | 0.835 | 0.854 | 0.659 | 0.852 | 0.846 | 0.852 | 0.888 | 0.790 |
| KTZ | 0.193 | 0.209 | 0.211 | 0.235 | 0.259 | 0.267 | 0.297 | 0.296 | 0.337 | 0.309 | 0.332 | 0.350 | 0.366 | 0.366 | 0.369 | 0.350 | 0.364 | 0.299 | 0.321 | 0.321 | 0.346 | 0.305 |
| KORAIL | 0.157 | 0.158 | 0.155 | 0.154 | 0.157 | 0.167 | 0.168 | 0.168 | 0.171 | 0.167 | 0.171 | 0.112 | 0.114 | 0.117 | 0.118 | 0.119 | 0.122 | 0.123 | 0.114 | 0.119 | 0.120 | 0.141 |
| UTI | 0.037 | 0.037 | 0.043 | 0.043 | 0.045 | 0.046 | 0.046 | 0.049 | 0.054 | 0.060 | 0.055 | 0.055 | 0.056 | 0.056 | 0.056 | 0.056 | 0.056 | 0.055 | 0.053 | 0.051 | 0.050 | 0.050 |
| CFR-SA | 0.044 | 0.042 | 0.034 | 0.039 | 0.038 | 0.038 | 0.036 | 0.033 | 0.031 | 0.027 | 0.027 | 0.023 | 0.020 | 0.019 | 0.022 | 0.023 | 0.022 | 0.025 | 0.024 | 0.026 | 0.016 | 0.029 |
| QR | 0.071 | 0.081 | 0.083 | 0.088 | 0.090 | 0.098 | 0.098 | 0.098 | 0.127 | 0.129 | 0.133 | 0.129 | 0.129 | 0.129 | 0.129 | 0.129 | 0.129 | 0.129 | 0.129 | 0.129 | 0.122 | 0.113 |
| mean | 0.106 | 0.107 | 0.109 | 0.113 | 0.117 | 0.121 | 0.121 | 0.128 | 0.135 | 0.127 | 0.135 | 0.131 | 0.132 | 0.133 | 0.135 | 0.135 | 0.131 | 0.136 | 0.139 | 0.137 | 0.135 | 0.127 |
