# Supplementary material for: Transportation Efficiency of Railway Operation Enterprises
Source: Research Square preprint supplement (doi:10.21203/rs.3.rs-2316597/v1), 2022-11-30
Supplement: Supplementary file 4 [file c292e4efe331b29215100593.docx]

**Table A3** One-stage comprehensive transportation efficiency

| Enterprise | 2000 | 2001 | 2002 | 2003 | 2004 | 2005 | 2006 | 2007 | 2008 | 2009 | 2010 | 2011 | 2012 | 2013 | 2014 | 2015 | 2016 | 2017 | 2018 | 2019 | 2020 | mean |
| --- | --- | --- | --- | --- | --- | --- | --- | --- | --- | --- | --- | --- | --- | --- | --- | --- | --- | --- | --- | --- | --- | --- |
| ÖBB | 0.154 | 0.161 | 0.171 | 0.174 | 0.181 | 0.168 | 0.187 | 0.19 | 0.202 | 0.211 | 0.231 | 0.204 | 0.238 | 0.205 | 0.208 | 0.238 | 0.302 | 0.315 | 0.309 | 0.263 | 0.229 | 0.216 |
| GKB | 0.097 | 0.099 | 0.101 | 0.299 | 0.286 | 0.114 | 0.11 | 0.117 | 0.11 | 0.113 | 0.113 | 0.115 | 0.116 | 0.116 | 0.115 | 0.115 | 0.135 | 0.136 | 0.144 | 0.152 | 0.161 | 0.136 |
| SNCB | 0.14 | 0.142 | 0.147 | 0.148 | 0.163 | 0.171 | 0.192 | 0.185 | 0.187 | 0.184 | 0.184 | 0.191 | 0.191 | 0.191 | 0.188 | 0.184 | 0.185 | 0.188 | 0.196 | 0.224 | 0.252 | 0.183 |
| BDZ | 0.076 | 0.068 | 0.063 | 0.114 | 0.119 | 0.111 | 0.114 | 0.109 | 0.101 | 0.08 | 0.088 | 0.093 | 0.094 | 0.093 | 0.099 | 0.087 | 0.08 | 0.082 | 0.09 | 0.103 | 0.105 | 0.094 |
| CD | 0.105 | 0.104 | 0.102 | 0.104 | 0.106 | 0.109 | 0.126 | 0.136 | 0.145 | 0.131 | 0.151 | 0.166 | 0.182 | 0.18 | 0.181 | 0.196 | 0.203 | 0.207 | 0.215 | 0.199 | 0.145 | 0.152 |
| EVR | 0.667 | 0.72 | 0.834 | 0.864 | 0.972 | 1 | 1 | 0.802 | 0.627 | 0.784 | 0.878 | 0.815 | 0.662 | 0.611 | 0.44 | 0.424 | 0.329 | 0.33 | 0.369 | 0.327 | 0.331 | 0.656 |
| VR | 0.231 | 0.23 | 0.234 | 0.25 | 0.258 | 0.263 | 0.29 | 0.287 | 0.301 | 0.265 | 0.289 | 0.3 | 0.31 | 0.343 | 0.354 | 0.369 | 0.536 | 0.632 | 0.678 | 0.824 | 0.747 | 0.381 |
| SNCF | 0.24 | 0.234 | 0.238 | 0.233 | 0.239 | 0.247 | 0.249 | 0.256 | 0.265 | 0.245 | 0.247 | 0.251 | 0.263 | 0.262 | 0.26 | 0.411 | 0.426 | 0.303 | 0.269 | 0.293 | 0.312 | 0.273 |
| DB AG | 0.217 | 0.246 | 0.256 | 0.188 | 0.205 | 0.223 | 0.225 | 0.225 | 0.224 | 0.226 | 0.233 | 0.223 | 0.217 | 0.211 | 0.185 | 0.183 | 0.2 | 0.198 | 0.194 | 0.191 | 0.189 | 0.212 |
| GYSEV/RÖEE | 0.097 | 0.093 | 0.079 | 0.092 | 0.1 | 0.107 | 0.131 | 0.111 | 0.103 | 0.09 | 0.1 | 0.101 | 0.194 | 0.185 | 0.099 | 0.099 | 0.098 | 0.184 | 0.211 | 0.214 | 0.204 | 0.128 |
| MAV | 0.101 | 0.105 | 0.107 | 0.115 | 0.114 | 0.121 | 0.13 | 0.124 | 0.922 | 0.157 | 0.098 | 0.101 | 0.099 | 0.096 | 0.095 | 0.091 | 0.092 | 0.088 | 0.09 | 0.086 | 0.085 | 0.144 |
| CIE | 0.625 | 0.601 | 0.584 | 0.574 | 0.537 | 0.639 | 0.672 | 0.72 | 0.709 | 0.604 | 0.602 | 0.588 | 0.566 | 0.562 | 0.608 | 0.687 | 0.681 | 0.747 | 0.747 | 0.747 | 0.747 | 0.645 |
| FS SpA | 0.211 | 0.228 | 0.23 | 0.222 | 0.227 | 0.228 | 0.231 | 0.234 | 0.239 | 0.224 | 0.225 | 0.219 | 0.219 | 0.22 | 0.228 | 0.232 | 1 | 0.292 | 0.263 | 0.261 | 0.259 | 0.271 |
| LDZ | 0.498 | 0.537 | 0.583 | 0.706 | 0.727 | 0.593 | 0.511 | 0.758 | 0.812 | 0.804 | 0.742 | 0.924 | 0.952 | 0.849 | 0.841 | 0.812 | 0.692 | 0.669 | 0.834 | 0.718 | 0.752 | 0.729 |
| LTG | 0.606 | 0.526 | 0.657 | 0.77 | 0.778 | 0.841 | 0.868 | 0.968 | 0.985 | 0.79 | 0.895 | 1 | 0.949 | 0.886 | 0.968 | 0.959 | 0.943 | 0.905 | 1 | 0.961 | 0.93 | 0.866 |
| CFL | 0.103 | 0.102 | 0.088 | 0.083 | 0.089 | 0.076 | 0.085 | 0.072 | 0.075 | 0.073 | 0.077 | 0.077 | 0.084 | 0.089 | 0.087 | 0.086 | 0.086 | 0.082 | 0.078 | 0.08 | 0.095 | 0.084 |
| PKP | 0.122 | 0.123 | 0.127 | 0.139 | 0.141 | 0.137 | 0.134 | 0.138 | 0.134 | 0.118 | 0.13 | 0.143 | 0.132 | 0.133 | 0.129 | 0.107 | 0.11 | 0.122 | 0.127 | 0.13 | 0.129 | 0.129 |
| FGC | 0.243 | 0.251 | 0.28 | 0.295 | 0.271 | 0.232 | 0.244 | 0.246 | 0.24 | 0.239 | 0.247 | 0.253 | 0.243 | 0.258 | 0.254 | 0.26 | 0.266 | 0.271 | 0.28 | 0.285 | 0.296 | 0.260 |
| SZ | 0.11 | 0.11 | 0.12 | 0.139 | 0.146 | 0.142 | 0.147 | 0.157 | 0.155 | 0.131 | 0.153 | 0.144 | 0.135 | 0.149 | 0.156 | 0.16 | 0.166 | 0.178 | 0.179 | 0.183 | 0.232 | 0.152 |
| BLS | 0.168 | 0.205 | 0.254 | 0.321 | 0.428 | 0.404 | 0.421 | 0.399 | 0.439 | 0.188 | 0.204 | 0.206 | 0.221 | 0.254 | 0.22 | 0.17 | 0.17 | 0.189 | 0.193 | 0.201 | 0.21 | 0.260 |
| SBB CFF FFS | 0.302 | 0.305 | 0.317 | 0.286 | 0.287 | 0.313 | 0.326 | 0.388 | 0.374 | 0.366 | 0.343 | 0.342 | 0.34 | 0.346 | 0.344 | 0.35 | 0.392 | 0.396 | 0.395 | 0.404 | 0.397 | 0.348 |
| ZBH | 0.011 | 0.012 | 0.014 | 0.015 | 0.03 | 0.053 | 0.048 | 0.05 | 0.057 | 0.044 | 0.057 | 0.06 | 0.049 | 0.053 | 0.065 | 0.062 | 0.058 | 0.057 | 0.065 | 0.065 | 0.065 | 0.047 |
| ZRS | 0.01 | 0.014 | 0.014 | 0.012 | 0.017 | 0.076 | 0.035 | 0.032 | 0.03 | 0.027 | 0.029 | 0.033 | 0.036 | 0.036 | 0.034 | 0.038 | 0.032 | 0.037 | 0.039 | 0.045 | 0.048 | 0.032 |
| ZS | 0.04 | 0.04 | 0.039 | 0.04 | 0.051 | 0.058 | 0.07 | 0.068 | 0.065 | 0.048 | 0.055 | 0.06 | 0.052 | 0.053 | 0.05 | 0.038 | 0.058 | 0.059 | 0.066 | 0.076 | 0.088 | 0.056 |
| BC | 0.491 | 0.437 | 0.448 | 0.459 | 0.47 | 0.483 | 0.507 | 0.52 | 0.52 | 0.441 | 0.477 | 0.51 | 0.499 | 0.409 | 0.423 | 0.375 | 0.386 | 0.442 | 0.475 | 0.436 | 0.384 | 0.457 |
| RZD | 0.674 | 0.603 | 0.632 | 0.693 | 0.693 | 0.631 | 0.677 | 0.855 | 0.861 | 0.661 | 0.738 | 0.78 | 0.843 | 0.843 | 0.868 | 0.879 | 0.898 | 0.956 | 0.999 | 1 | 1 | 0.799 |
| TCDD | 0.186 | 0.151 | 0.149 | 0.184 | 0.185 | 0.201 | 0.158 | 0.157 | 0.16 | 0.141 | 0.159 | 0.191 | 0.173 | 0.178 | 0.197 | 0.191 | 0.203 | 0.227 | 0.251 | 0.249 | 0.252 | 0.188 |
| SCR | 0.02 | 0.02 | 0.03 | 0.034 | 0.045 | 0.04 | 0.037 | 0.038 | 0.039 | 0.043 | 0.055 | 0.061 | 0.064 | 0.063 | 0.058 | 0.047 | 0.054 | 0.061 | 0.059 | 0.056 | 0.055 | 0.047 |
| AZ | 0.08 | 0.085 | 0.097 | 0.106 | 0.106 | 0.104 | 0.104 | 0.121 | 0.138 | 0.104 | 0.119 | 0.113 | 0.121 | 0.121 | 0.121 | 0.095 | 0.095 | 0.102 | 0.087 | 0.111 | 0.111 | 0.107 |
| CR | 0.916 | 0.855 | 0.874 | 0.894 | 0.978 | 1 | 0.897 | 0.949 | 1 | 0.892 | 0.977 | 1 | 0.99 | 1 | 0.987 | 0.955 | 0.959 | 1 | 1 | 1 | 0.811 | 0.949 |
| GR | 0.079 | 0.087 | 0.101 | 0.108 | 0.109 | 0.14 | 0.153 | 0.275 | 0.245 | 0.2 | 0.226 | 0.231 | 0.242 | 0.227 | 0.206 | 0.195 | 0.162 | 0.107 | 0.08 | 0.087 | 0.088 | 0.159 |
| IR | 0.582 | 0.589 | 0.604 | 0.629 | 0.647 | 0.683 | 0.727 | 0.798 | 0.88 | 0.919 | 0.993 | 0.978 | 0.978 | 0.978 | 1 | 0.99 | 0.99 | 0.971 | 0.987 | 0.968 | 0.869 | 0.846 |
| JR | 0.797 | 0.802 | 0.806 | 0.938 | 0.826 | 0.84 | 0.854 | 0.866 | 0.88 | 0.866 | 1 | 0.839 | 0.861 | 0.862 | 0.931 | 0.944 | 0.748 | 0.958 | 0.978 | 0.962 | 1 | 0.884 |
| KTZ | 0.441 | 0.476 | 0.493 | 0.549 | 0.616 | 0.625 | 0.694 | 0.686 | 0.808 | 0.747 | 0.773 | 0.822 | 0.853 | 0.853 | 0.903 | 0.85 | 1 | 1 | 0.735 | 0.735 | 0.792 | 0.736 |
| KORAIL | 0.993 | 1 | 0.967 | 0.982 | 0.676 | 0.692 | 0.639 | 0.638 | 0.646 | 0.616 | 0.607 | 0.398 | 0.414 | 0.432 | 0.433 | 0.426 | 0.436 | 0.427 | 0.399 | 0.408 | 0.391 | 0.601 |
| UTI | 0.226 | 0.225 | 0.272 | 0.273 | 0.292 | 0.372 | 0.353 | 0.384 | 0.418 | 0.459 | 0.422 | 0.413 | 0.42 | 0.42 | 0.424 | 0.424 | 0.431 | 0.398 | 0.414 | 0.429 | 0.439 | 0.377 |
| CFR-SA | 0.108 | 0.104 | 0.095 | 0.108 | 0.114 | 0.43 | 0.102 | 0.092 | 0.085 | 0.067 | 0.108 | 0.072 | 0.064 | 0.061 | 0.067 | 0.069 | 0.066 | 0.071 | 0.068 | 0.068 | 0.045 | 0.098 |
| QR | 0.518 | 0.605 | 0.633 | 0.651 | 0.674 | 0.74 | 0.744 | 0.744 | 0.819 | 0.82 | 0.805 | 1 | 1 | 1 | 1 | 1 | 1 | 1 | 1 | 1 | 1 | 0.845 |
| mean | 0.297 | 0.297 | 0.312 | 0.337 | 0.340 | 0.353 | 0.347 | 0.366 | 0.395 | 0.345 | 0.364 | 0.369 | 0.370 | 0.364 | 0.364 | 0.363 | 0.386 | 0.379 | 0.383 | 0.383 | 0.375 | 0.357 |
